# Supplementary material for: Sucrose triggers a novel signaling cascade promoting Bacillus subtilis rhizosphere colonization
Source: PubMed Central journal article supplement (PMC8397739; doi:10.1038/s41396-021-00966-2), 2021-03-26
Supplement: 41396_2021_966_MOESM1_ESM.pdf [file 41396_2021_966_MOESM1_ESM.pdf]

1 **Supplementary Materials\_Tian et al.**

2 **Supplemental Methods.**

3 **16S rRNA gene MiSeq sequencing.**

4 The genomic DNA of the microbial community in the rhizosphere samples was  
5 extracted using the Fast DNA<sup>®</sup> Spin Kit for Soil (MP Biomedicals, U.S.A) according  
6 to manufacturer's instructions. The DNA extract was checked on 1% agarose gel. The  
7 concentration and purity of the extracted genomic DNA were determined with  
8 ScanDrop 100 spectrophotometer (Analytic Jena AG, Germany). The genomic DNA  
9 extracts were stored at -20°C for further use.

10 16S rRNA gene amplification and sequencing were conducted by Majorbio  
11 Bio-Pharm Technology Co., Ltd. (Shanghai, China). Briefly, the V3-V4 hypervariable  
12 region of the 16S rRNA gene was amplified by PCR using primers 338F (5'-  
13 ACTCCTACGGGAGGCAGCAG-3') and 806R (5'-  
14 GGACTACHVGGGTWTCTAAT-3') in an ABIGeneAmp<sup>®</sup>9700 PCR thermocycler  
15 (ABI, CA, USA). The PCR amplification of 16S rRNA gene was performed as  
16 follows: initial denaturation at 95 °C for 3 min, followed by 27 cycles of denaturing at  
17 95 °C for 30 s, annealing at 55 °C for 30 s and extension at 72 °C for 45 s, and single  
18 extension at 72 °C for 10 min, and terminate at 4 °C. The PCR mixtures contain 5 ×  
19 *TransStart* FastPfu buffer 4 μL, 2.5 mM dNTPs 2 μL, forward primer (5 μM) 0.8 μL,  
20 reverse primer (5 μM) 0.8 μL, *TransStart* FastPfu DNA Polymerase 0.4 μL, template  
21 DNA 10 ng, and finally ddH<sub>2</sub>O up to 20 μL. PCR reactions were performed in  
22 triplicate. The PCR product was extracted from 2% agarose gel, purified using the  
23 AxyPrep DNA Gel Extraction Kit (Axygen Biosciences, Union City, CA, USA)  
24 according to manufacturer's instructions and quantified using Quantus<sup>™</sup> Fluorometer  
25 (Promega, USA). Purified amplicons were pooled in equimolar and paired-end

26 sequenced ( $2 \times 300$  bp) on an Illumina MiSeq platform (Illumina, San Diego, USA)  
27 according to the standard protocols by Majorbio Bio-Pharm Technology Co. Ltd.  
28 (Shanghai, China). All of the raw reads are archived at the NCBI Sequence Read  
29 Archive (SRA) database (accession number: SRR 10279951- 10279968).

30

### 31 **Sequencing analyses.**

32 The raw 16S rRNA gene sequencing reads were demultiplexed, quality-filtered by  
33 Trimmomatic (version 0.39, [http:// usadellab.org/cms/](http://usadellab.org/cms/)) and merged by FLASH with  
34 the following criteria: (i) the 300 bp reads were truncated at any site receiving an  
35 average quality score of  $<20$  over a 50 bp sliding window, and the truncated reads  
36 shorter than 50 bp were discarded; reads containing ambiguous characters were also  
37 discarded; (ii) only overlapping sequences longer than 10 bp were assembled  
38 according to their overlapped sequences. The maximum mismatch ratio of overlap  
39 region is 0.2. Reads that could not be assembled were discarded; (iii) Samples were  
40 distinguished according to the barcode and primers, and the sequence direction was  
41 adjusted based on exact barcode matching (allowing 2 nucleotide mismatch in primer  
42 matching). Operational taxonomic units (OTUs) with 97% similarity cutoff were  
43 clustered using UPARSE (version7.1, <http://drive5.com/uparse/>), and chimeric  
44 sequences were identified and removed. The taxonomy of each OTU representative  
45 sequence was analyzed by RDP Classifier (<http://rdp.cme.msu.edu/>) against the 16S  
46 rRNA database (SILVA SSU128) using confidence threshold of 70%.

47

### 48 **Quantification of the fluorescent signal density.**

49 For imaging of the  $P_{srfAA-gfp}$  fluorescent reporter strain (CY106), cells were grown in  
50 LB broth to log phase. 2  $\mu$ L log phase culture was spotted onto the center of the solid

51 LB plates supplemented with or without sucrose (5 g/L) and plates were incubated at  
52 37C. After 4 hours of incubation, cells were collected from the plates, spun down,  
53 washed with PBS buffer once, and resuspended in 100  $\mu$ L of PBS buffer. 2  $\mu$ L of the  
54 resuspension was placed on a 1% (w/v) agarose pad, covered with a cover slip, and  
55 observed under fluorescent microscopy. Imaging of different samples was conducted  
56 using the same exposure settings. To quantify the fluorescence intensity of the  $P_{sfAA-}$   
57 *gfp* expressing cells fluorescence of a total of about 200 cells was quantified using the  
58 MicrobeJ plugin for ImageJ <sup>1,2</sup>. For integrated intensity, areas of the selected cell and  
59 background fluorescence were measured, total cell fluorescence of each cell was  
60 calculated by using integrated intensity to subtract mean background fluorescence.

61

#### 62 **Assays of $\beta$ -galactosidase activities.**

63 To measure  $\beta$ -galactosidase activity, the reporter strain (KG203) was inoculated on  
64 solid LB plates (1.5% agar, w/v) supplemented either sucrose or glucose (5 g/L) or no  
65 sugar addition as described in the solid surface motility assay. After 4 h of cultivation,  
66 cells were collected from the edge of the colonies on the plates, and  $\beta$ -galactosidase  
67 specific activities were quantified as described <sup>3</sup>.

68

#### 69 **Laser scanning confocal microscopy (LSCM)**

70 Collected root samples were mounted on microscope slides (VWR, USA) and were  
71 directly observed under the laser confocal microscope (Zeiss LSM 800) at the  
72 excitation wavelength of 561 nm. All images were taken at the same exposure time  
73 and processed identically. The images were acquired using ZEN 2.3 (blue edition) and  
74 exported as tiff files. Each image is a representative of at least 10 root colonization  
75 assays performed in three independent experiments.

76 **Light microscopy and photography**

77 For phase or regular imaging, three different devices were used: a Nikon SMZ800N  
78 stereomicroscope was used to capture colony morphology; photographs for cell  
79 motility on agar plates were recorded by a canon EOS 750D digital camera; all high-  
80 magnification imaging at the cellular level was done with the Leica DM3000  
81 workstation (2000× magnification).

82

83 **Surfactin production assay.**

84 For analysis of surfactin production, cells were incubated on either solid LB plates or  
85 solid MSgg<sup>4</sup> media with or without various sugars at 30°C for 12 h or 72 h,  
86 respectively, and samples of colony were taken by a hole puncher with a diameter of  
87 0.5 cm. 10 pieces of samples from each treatment were put into flaks with 50 mL  
88 ddH<sub>2</sub>O and shaken for 5 min for surfactin extraction. 45 mL liquid was taken and  
89 centrifuged (5 min, 14,200g) to remove cells, and the supernatant was filter-sterilized.  
90 40 mL cell free culture filtrate was then mixed with 40 mL acetonitrile (Merck, PA,  
91 USA). Crude surfactin was extracted, further purified by an adapted SPE (solid phase  
92 extraction) technique, and detected by the Accela HPLC system (Thermo Fisher  
93 Scientific) as previously described <sup>5</sup>.

94

95

96 **Supplemental Figure Legends.**

97 **Figure S1. The growth profile of *B. subtilis* 3610 and the mutants ( $\Delta sacA$  and**  
98  **$\Delta sacB$ ) in the minimal MSgg, or M9, or LB media supplemented with various**  
99 **sugars.** MSgg contains 0.5% glycerol as the carbon source. For M9, 0.4% (w/v)  
100 glucose was added as the carbon source prior to addition of any other sugars. For  
101 supplementation of different sugars (Suc: sucrose, Glu: glucose, Fru: fructose, Mal:  
102 maltose, Inu: inulin, FOS: fructooligosaccharide, Dex: dextran or Lev: levan), the  
103 indicated sugar was added into the above media at the final concentration of 5 g/L.  
104 Glu/Fru in (a) indicates a combination of both glucose and fructose, each at 2.5 g/L.  
105 The growth profile of *B. subtilis* 3610 and the  $\Delta sacA$  and  $\Delta sacB$  mutants were  
106 similarly assayed in MSgg (d), M9 (e), and LB (f) with or without addition of sucrose  
107 (Suc, 5 g/L). The data represents the mean of three independent assays performed in  
108 duplicate. Error bars indicate standard deviations.

109

110 **Figure S2. Effects of various supplemented sugars on *B. subtilis* colony**  
111 **morphology and solid surface motility (SSM). a.** SSM by the WT and the  $\Delta hag$   
112 mutant on solid LB media (1.5% agar, w/v) with or without supplementation of 5 g/L  
113 sucrose. **b.** Sucrose specifically triggers a robust SSM of 3610 on solid LB media (1.5%  
114 agar, w/v). Top-down view of colony morphology in which *B. subtilis* 3610 was  
115 incubated for 24 h at 30 °C in the presence of different sugars as indicated (5 g/L). **c.**  
116 Levan specifically induces SSM by *B. subtilis* 3610. 3610 was incubated for 16 h on  
117 solid LB plates supplemented with levan or various plant polysaccharides (Lev: levan,  
118 Xyl: xylan, Pec: pectin, Cel: cellulose) at 0.2 g/L. Pictures are representatives of at  
119 least 3 independent plates. Results are representatives of three experiments.

120

121 **Figure S3. The phylogenetic analysis of 16S rRNA gene sequences of the *Bacillus***  
122 **strains.** Sequences of *Bacillus* strains (3610, NCD-2, 9407, TB1501, TB1340 and  
123 B579) were downloaded from Genebank database (www.ncbi.nlm.nih.gov). The tree  
124 was constructed in MEGA 7.0 using the Neighbor-Joining method, with 1,000  
125 bootstrap samplings.

126

127 **Figure S4. Sucrose-induced surfactin production depends on *sacB*, but not *sacA*.**  
128 The effect of sucrose-induced surfactin yield ( $\mu\text{g}/\text{cm}^2$ ) was assayed on solid LB (**a**,  
129 incubation for 12 h) agar plates and MSgg (**b**, incubation for 30 h) agar plates (1.5%  
130 agar, w/v) in the presence or absence of sucrose (5 g/L) in the WT (3610),  $\Delta\text{sacA}$   
131 (Tm13) and  $\Delta\text{sacB}$  (Tm14) mutants. Samples were collected from the plates.  
132 Surfactin was extracted, and the amount of surfactin was determined by HPLC as  
133 described in the method. The error bars represent standard deviations from triplicate  
134 assays. \*\* indicates  $p$  value  $< 0.01$ ; NS, no statistical difference.

135

136 **Figure S5.  $\Delta\text{hag}$  and  $\Delta\text{srfAA}$  deletion mutants of *B. subtilis* showed decreased**  
137 **root colonization.** The difference on the tomato root colonization between the WT  
138 and the  $\Delta\text{hag}$  (Tm05) and  $\Delta\text{srfAA}$  (Tm01) deletion mutants was determined by  
139 counting colony forming unit (CFU) per mm root length by plate recovery counting as  
140 described in the method. The data represents the mean of three independent assays  
141 performed in duplicate. Error bar indicates standard deviations, and single asterisks or  
142 double asterisks (\* or \*\*) indicate significant differences by LSD at  $p < 0.05$  or  $p <$   
143  $0.01$ . S stands for supplementation of sucrose.

144

145 **Figure S6. Quantification of 16S rRNA gene copies in the rhizomicrobiome**

146 **samples.** The quantitative bacterial population (16S rRNA gene copies/gram soil) of  
147 the tomato root rhizosphere inoculated with *B. subtilis* 3610 or the  $\Delta sacB$  mutant and  
148 with or without supplementation of sucrose. A: *B. subtilis* 3610, AS: *B. subtilis* 3610  
149 plus sucrose, B:  $\Delta sacB$  mutant, BS:  $\Delta sacB$  mutant plus sucrose, C: no 3610 and  
150 sucrose, CS: with only sucrose. The letters above the columns indicate statistically  
151 significant differences based on Student's t-test ( $p < 0.05$ ). Values are given as mean  
152 of three independent biological replicates and the bars represent standard deviations.

153

154 **Figure S7.** The relative abundance of 50 top genus groups by  
155 community barplot analysis. 51 different colors represent different bacterial genus.

156

157 **Figure S8. The phylogenetic tree based on putative SacB protein homologs in**  
158 **various bacteria.** These SacB protein sequences of the related strains were  
159 downloaded from UniProt database ([www.uniprot.org](http://www.uniprot.org)). The blue branches show the  
160 position of SacB in *Bacillus*. The tree was constructed using ClustalW in MEGA 7.0,  
161 with 1,000 bootstrap samplings. Bar represents 0.4 substitutions per amino acid  
162 position.

163

164 **Figure S9. Levan induces SSM in other soil bacteria.** Soil bacteria (*Serratia*  
165 *marcescens* T4-3, *Pectobacterium carotovorum* subsp. *carotovorum* Z3-3,  
166 *Xanthomonas oryzae* pv. *oryzae* PXO99F, *Pseudomonas. protegens* pf-5, and *P.*  
167 *fluorescens* 2p24) were incubated for 16 h on solid LB plates supplemented with  
168 levan or its structural analogues (inulin, FOS, and dextran) at the concentration of 0.2  
169 g/L. Pictures are representatives of at least 3 independent experiments.

170

171 **Table S1. Strains used in this study**  
 172

| Strains             | Relevant phenotype                                                      | Reference             |
|---------------------|-------------------------------------------------------------------------|-----------------------|
| <b>Bacillus. sp</b> |                                                                         |                       |
| NCIB3610            | wild-type <i>B. subtilis</i> capable of robust biofilms                 | <sup>4</sup>          |
| 168                 | domesticated <i>B. subtilis</i> strain                                  | <sup>6</sup>          |
| BKK03480            | 168 <i>srfAA::kan</i>                                                   | BGSC                  |
| BKK38040            | 168 <i>sacA::kan</i>                                                    | BGSC                  |
| BKE34450            | 168 <i>sacB::erm</i>                                                    | BGSC                  |
| BKE34460            | 168 <i>levB::erm</i>                                                    | BGSC                  |
| BKK27030            | 168 <i>sacC::kan</i>                                                    | BGSC                  |
| BKK34470            | 168 <i>yveA::kan</i>                                                    | BGSC                  |
| NCD-2               | wild-type <i>B. subtilis</i>                                            | <sup>7</sup>          |
| B579                | wild-type <i>B. subtilis</i>                                            | <sup>8</sup>          |
| CAU9407             | wild-type <i>B. subtilis</i>                                            | <sup>9</sup>          |
| TB1340              | wild-type <i>B. velezensis</i>                                          | CP022531.1*           |
| TB1501              | wild-type <i>B. velezensis</i>                                          | MT946907*             |
| B905                | wild-type <i>B. cereus</i>                                              | <sup>10</sup>         |
| TG071               | <i>B. cereus</i> B905 harboring pGFP78, Tet <sup>R</sup>                | <sup>10</sup>         |
| CY106               | 3610 <i>lacA::P<sub>srfAA</sub>-gfp</i> , mls <sup>R</sup> , DL746→3610 | this study            |
| EH039               | 3610 <i>amyE::P<sub>comGA</sub>-gfp</i> , Cm <sup>R</sup>               | this study            |
| KG203               | 3610 <i>amyE::P<sub>srfAA</sub>-lacZ</i> , cm <sup>R</sup>              | this study            |
| Tm01                | 3610 <i>srfAA::kan</i>                                                  | this study            |
| Tm02                | NCD-2 <i>srfAA::kan</i>                                                 | gift from Ping Ma     |
| Tm03                | 9407 <i>srfAA::kan</i>                                                  | <sup>9</sup>          |
| Tm05                | 3610 <i>hag::mls</i>                                                    | this study            |
| Tm13                | 3610 <i>sacA::kan</i> , BKK38040→3610                                   | this study            |
| Tm14                | 3610 <i>sacB::kan</i> , BKK34450→3610                                   | this study            |
| Tm23                | 3610 <i>sacC::kan</i> , BKK27030→3610                                   | this study            |
| Tm26                | 3610 <i>levB::erm</i> , BKE34460→3610                                   | this study            |
| Tm28                | 3610 <i>yveA::kan</i> , BKK34470→3610                                   | this study            |
| Tm31                | 3610 <i>sacA::kan</i> , <i>amyE::P<sub>hyspank</sub>-mKate2::chl</i>    | this study            |
| Tm32                | 3610 <i>sacB::erm</i> , <i>amyE::P<sub>hyspank</sub>-mKate2::chl</i>    | this study            |
| YC843               | 3610 <i>amyE::P<sub>hyspank</sub>-mKate2::chl</i>                       | this study            |
| <b>Others</b>       |                                                                         |                       |
| T4-3                | wild-type <i>Serratia marcescens</i>                                    | laboratory collection |
| Z3-3                | wild-type <i>Pectobacterium carotovorum</i> subsp. <i>carotovorum</i>   | laboratory collection |
| PXO99F              | wild-type <i>Xanthomonas oryzae</i> pv. <i>oryzae</i>                   | laboratory collection |
| AACOO1              | wild-type <i>Acidovorax citrulli</i>                                    | laboratory collection |
| PsmDG34             | wild-type <i>Pseudomonas syringae</i> pv. <i>maculicola</i>             | laboratory collection |
| pf-5                | wild-type <i>P. protegens</i>                                           | laboratory collection |
| 2P24                | wild-type <i>P. fluorescens</i>                                         | laboratory collection |
| 2-79                | wild-type <i>P. fluorescens</i>                                         | laboratory collection |
| PA01                | wild-type <i>P. aeruginosa</i>                                          | laboratory collection |
| T63                 | wild-type <i>Ochrobactrum</i> sp.                                       | laboratory collection |
|                     |                                                                         |                       |
|                     | <i>Fusarium oxysporum</i> f. sp. <i>lycopersici</i>                     | laboratory collection |
|                     | <i>Botrytis cinerea</i>                                                 | laboratory collection |

173 \*GenBank access numbers  
 174



175 **Supplemental references**

- 176 1 Ducret, A., Quardokus, E. M. & Brun, Y. V. MicrobeJ, a tool for high  
177 throughput bacterial cell detection and quantitative analysis. *Nat Microbiol* **1**,  
178 16077, doi:10.1038/nmicrobiol.2016.77 (2016).
- 179 2 Gozzi, K. *et al.* *Bacillus subtilis* utilizes the DNA damage response to manage  
180 multicellular development. *npj Biofilms Microbiomes* **3**, 8,  
181 doi:10.1038/s41522-017-0016-3 (2017).
- 182 3 She, Q. *et al.* Negative Interplay between Biofilm Formation and Competence  
183 in the Environmental Strains of *Bacillus subtilis*. *mSystems* **5** (2020).
- 184 4 Branda, S. S., González-Pastor, J. E., Ben-Yehuda, S., Losick, R. & Kolter, R.  
185 Fruiting body formation by *Bacillus subtilis*. *Proc Nat Acad Sci USA* **98**,  
186 11621-11626 (2001).
- 187 5 Aleti, G. *et al.* Surfactin variants mediate species-specific biofilm formation  
188 and root colonization in *Bacillus*. *Environ Microbiol* **18**, 2634-2645 (2016).
- 189 6 Zeigler, D. R. *et al.* The Origins of 168, W23, and Other *Bacillus subtilis*  
190 Legacy Strains. *J Bacteriol* **190**, 6983-6995, doi:10.1128/jb.00722-08 (2008).
- 191 7 Guo, Q. *et al.* Fengycin produced by *Bacillus subtilis* NCD-2 plays a major  
192 role in biocontrol of cotton seedling damping-off disease. *Microbiol Res* **169**,  
193 533-540, doi:<https://doi.org/10.1016/j.micres.2013.12.001> (2014).
- 194 8 Chen, F. *et al.* Quantitative changes of plant defense enzymes and  
195 phytohormone in biocontrol of cucumber Fusarium wilt by *Bacillus subtilis*  
196 B579. *World J Microbiol Biotech* **26**, 675-684 (2010).
- 197 9 Fan, H. *et al.* Biocontrol of bacterial fruit blotch by *Bacillus subtilis* 9407 via  
198 surfactin-mediated antibacterial activity and colonization. *Front Microbiol* **8**,  
199 1973-1988 (2017).
- 200 10 Gao, T. *et al.* The phosphotransferase system gene *ptsH* plays an important  
201 role in MnSOD production, biofilm formation, swarming motility, and root  
202 colonization in *Bacillus cereus* 905. *Res Microbiol* **170**, 86-96,  
203 doi:<https://doi.org/10.1016/j.resmic.2018.10.002> (2019).

204

**A**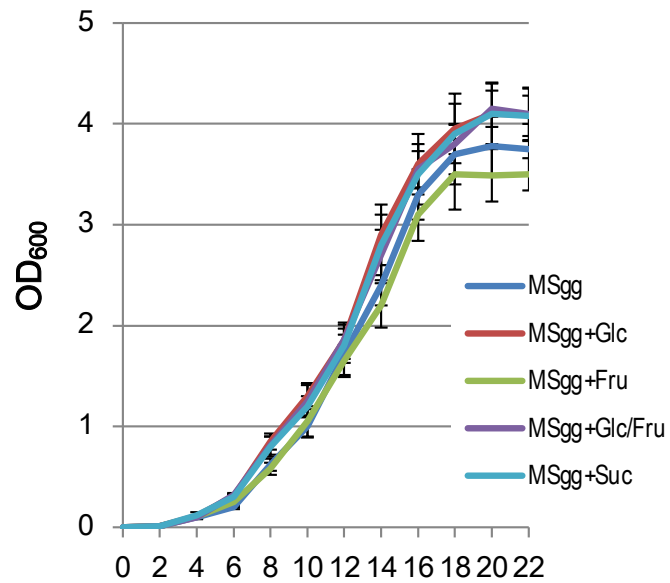**B**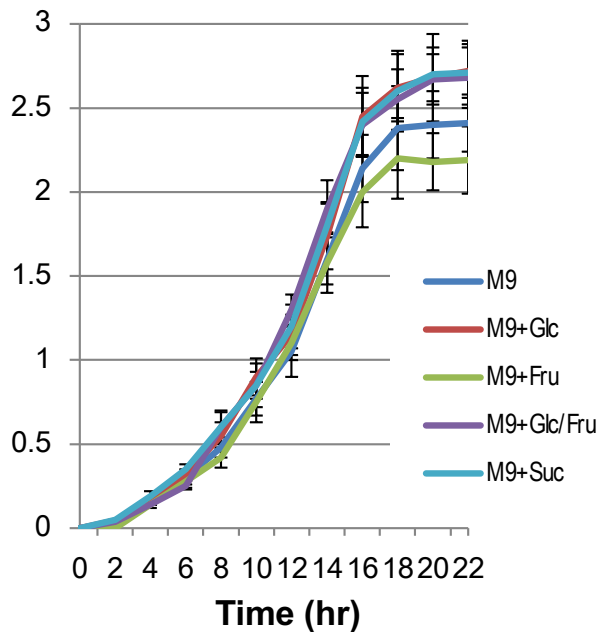**C**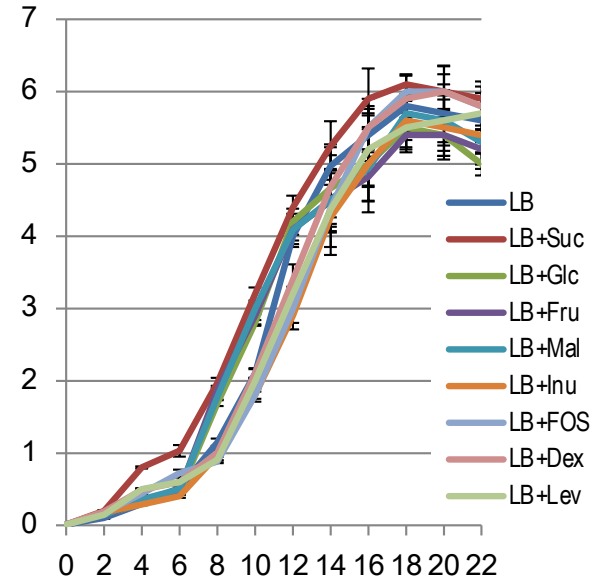**D**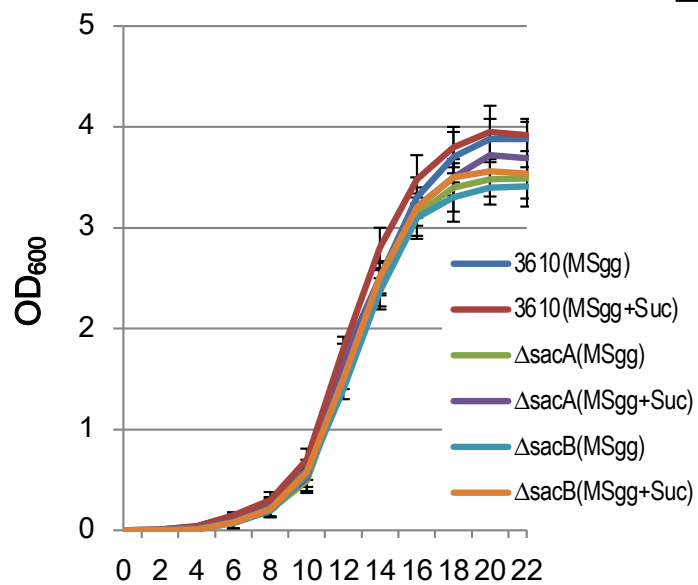**E**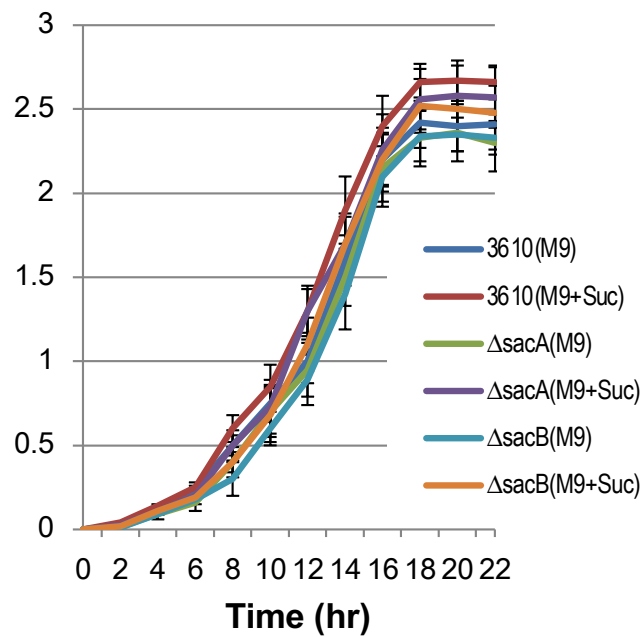**F**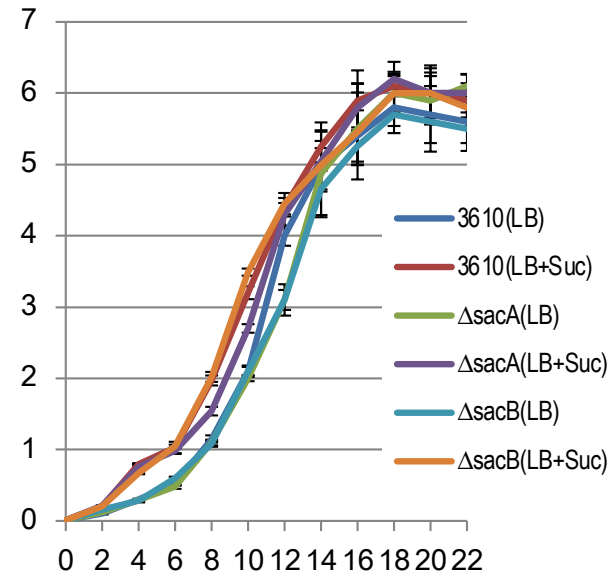**Figure S1**

**A**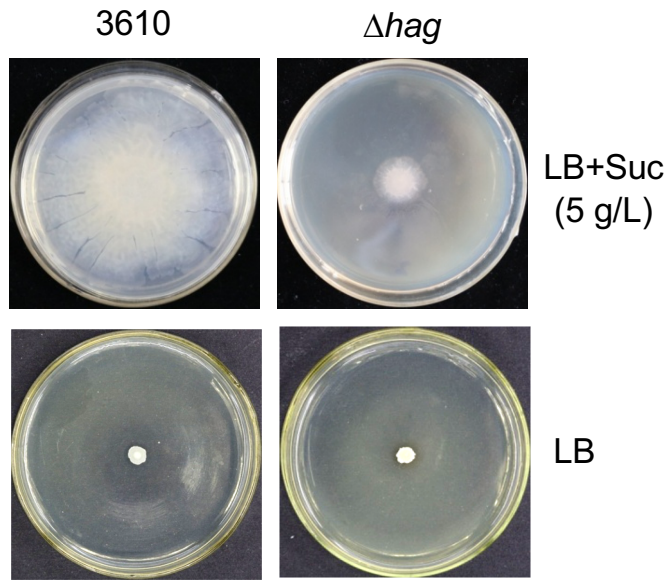**B**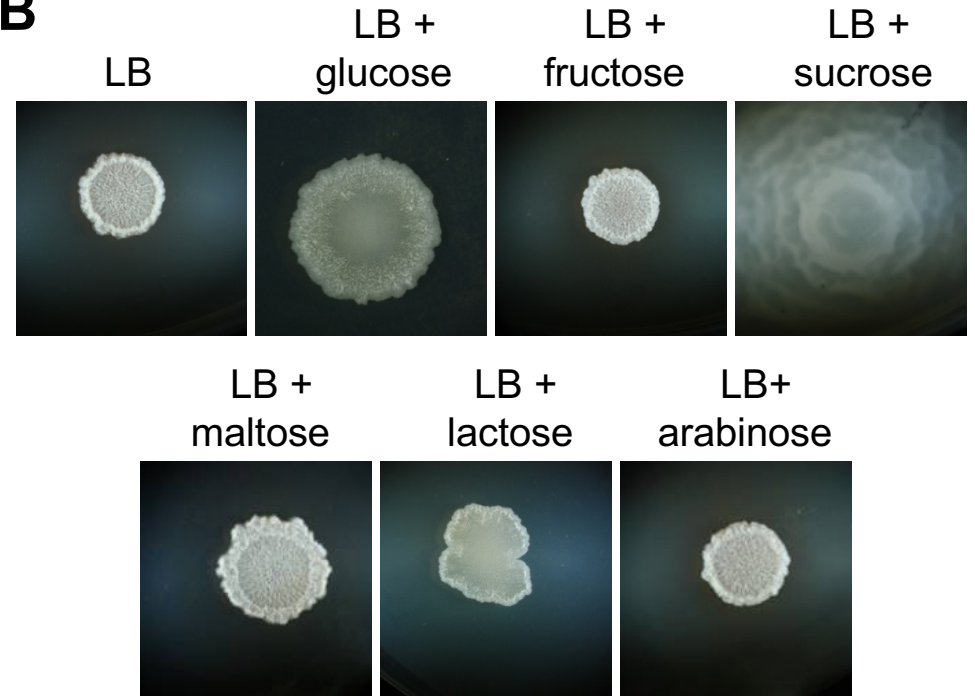**C**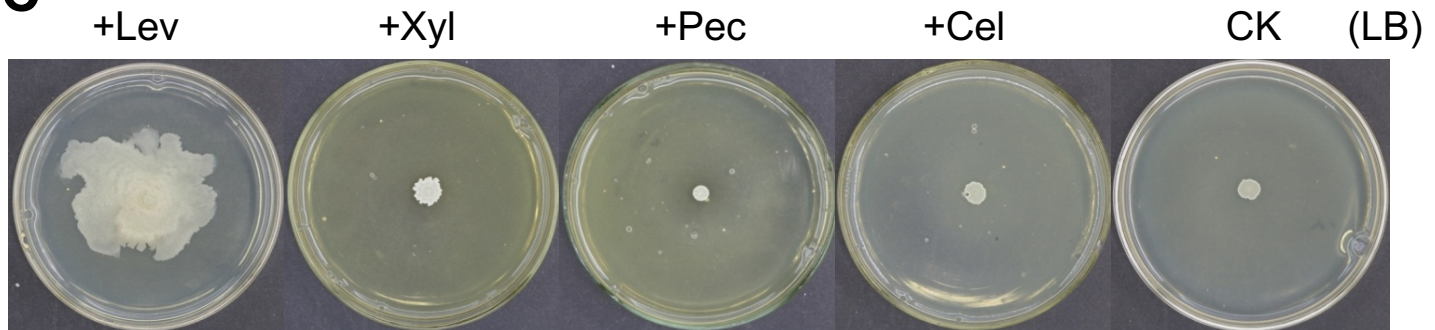**Figure S2**

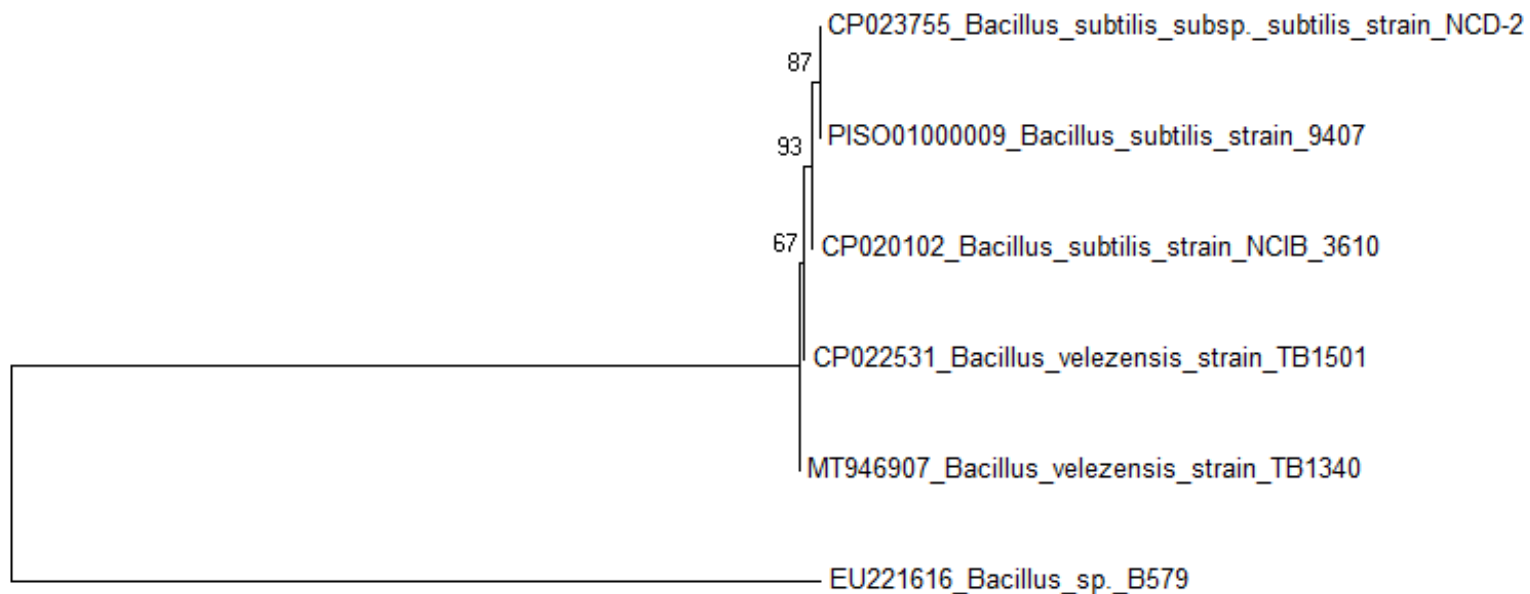

0.050

**Figure S3**

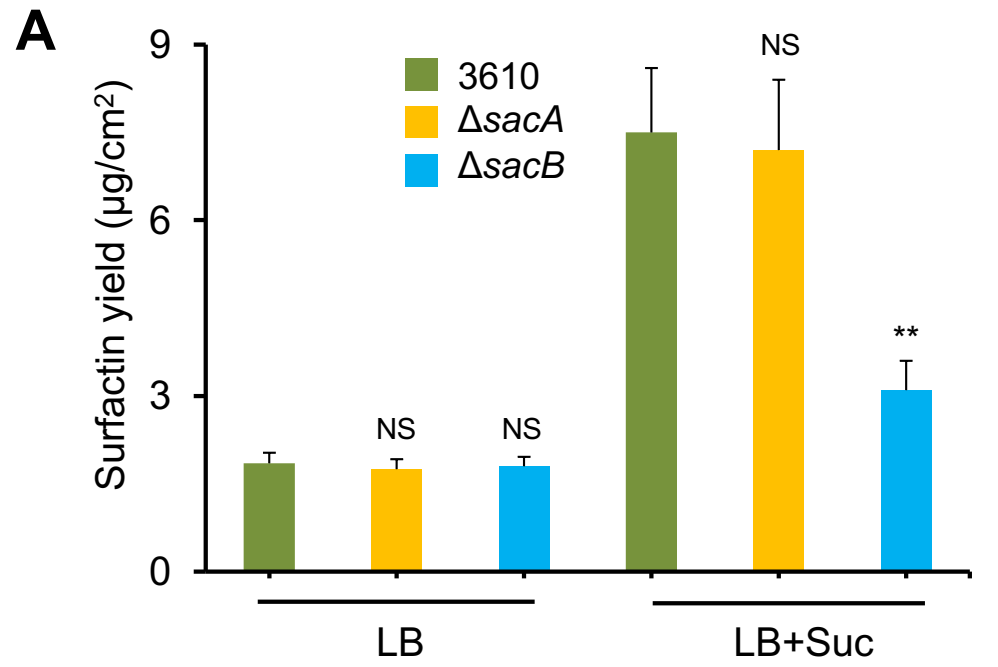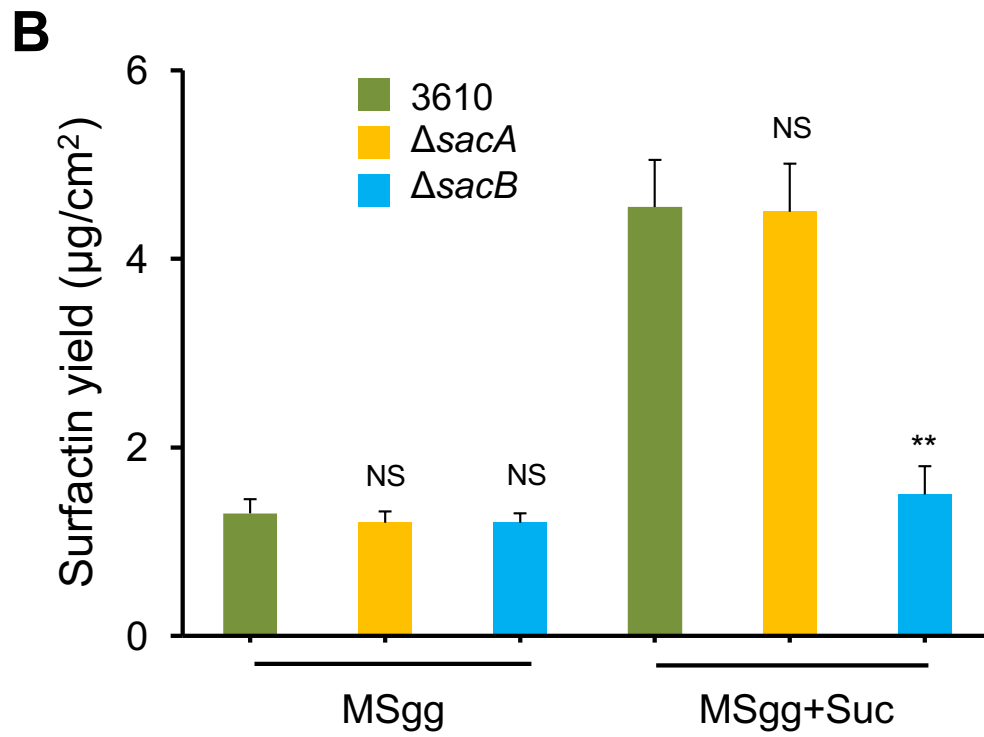

Figure S4

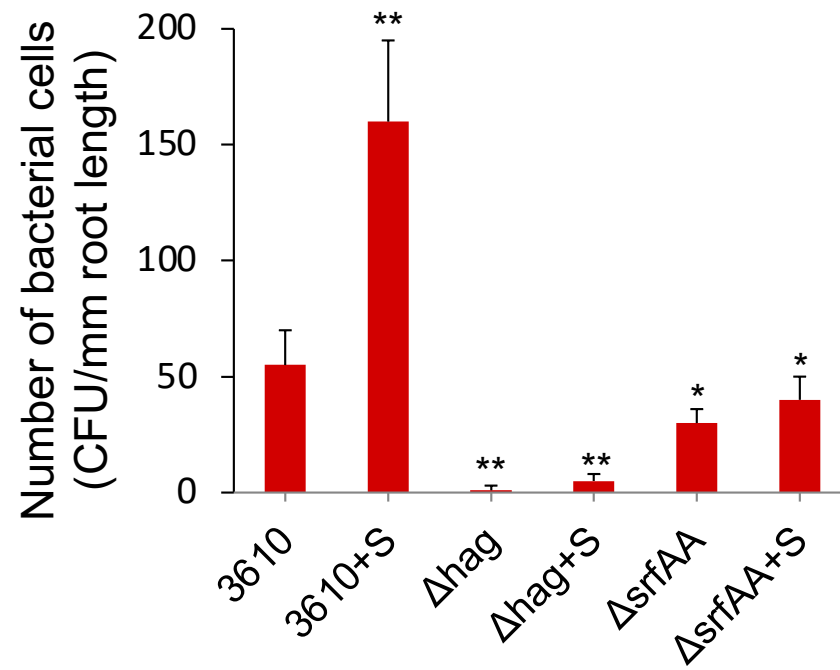

Figure S5

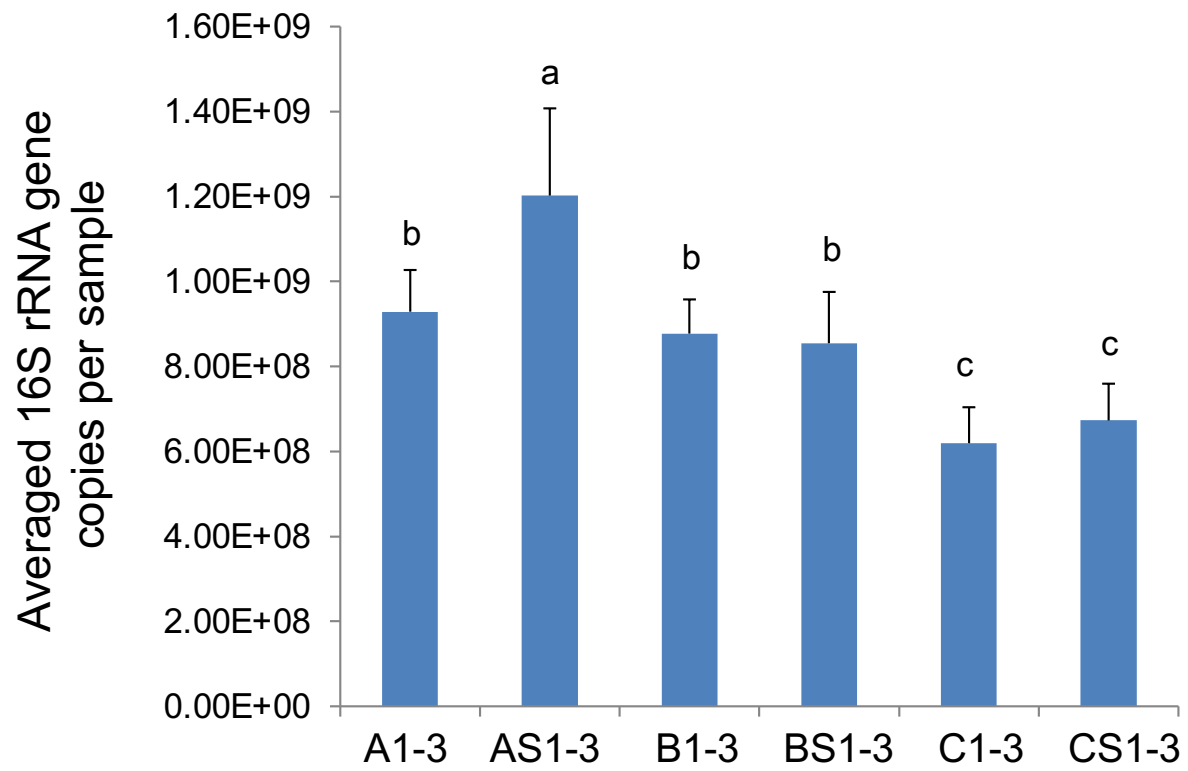

Figure S6

### Community barplot analysis

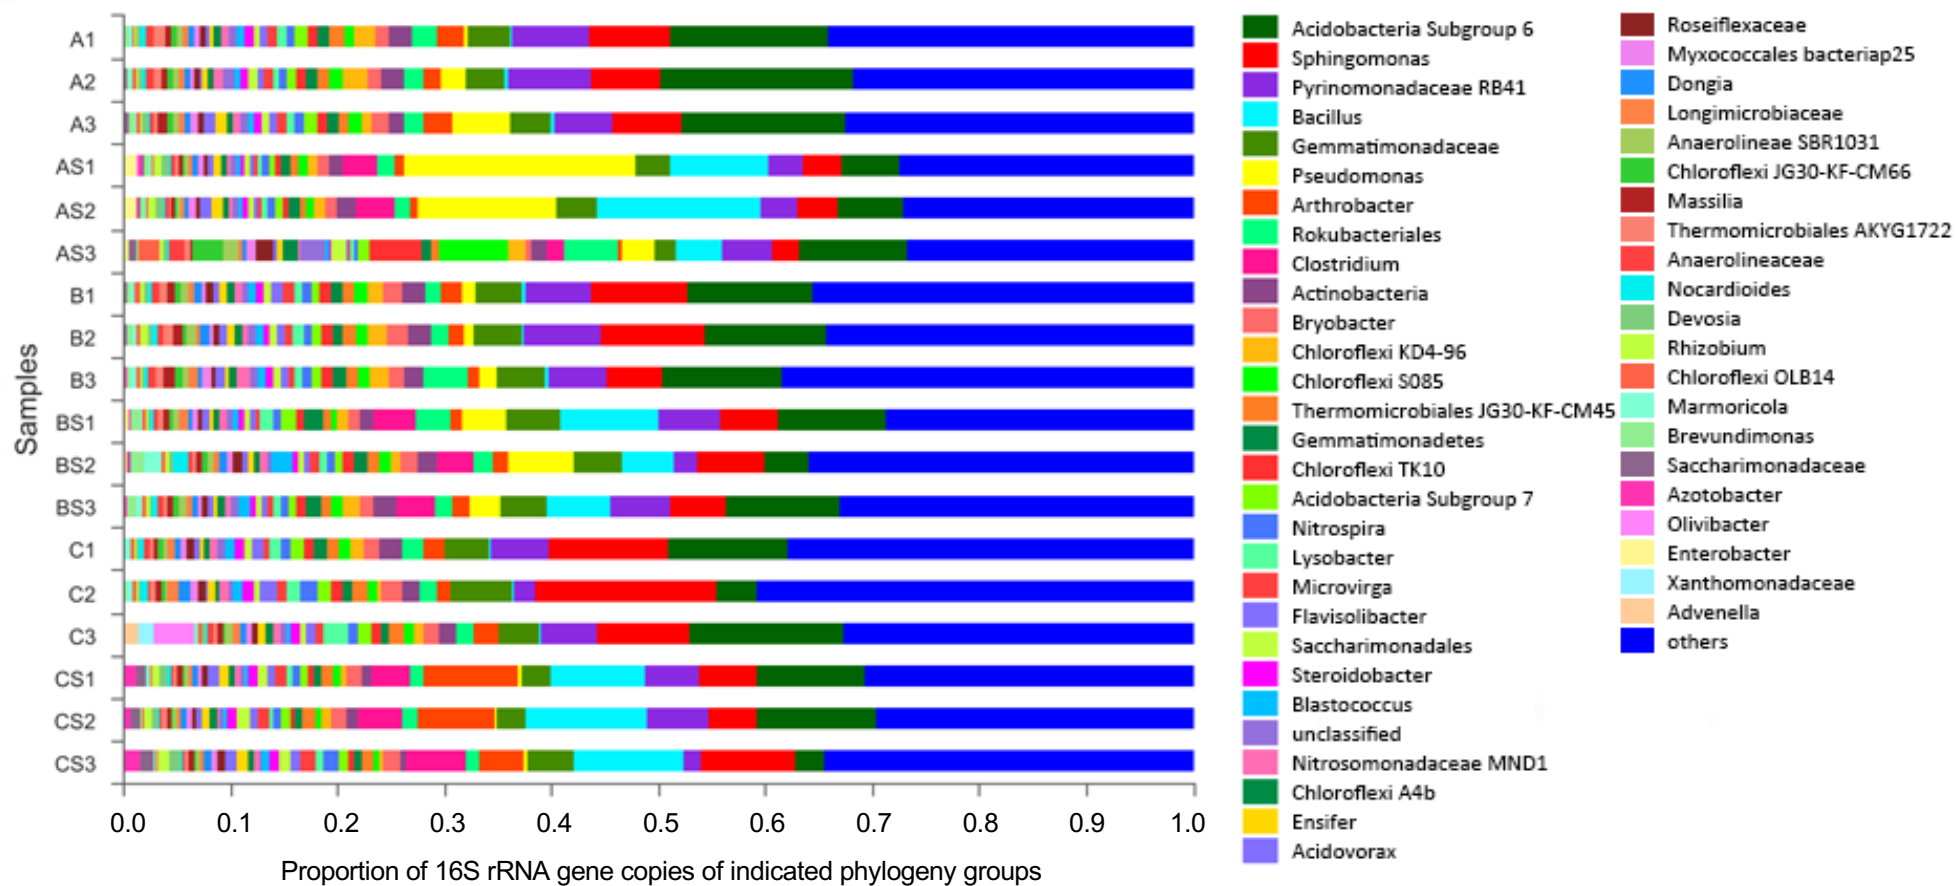

Figure S7



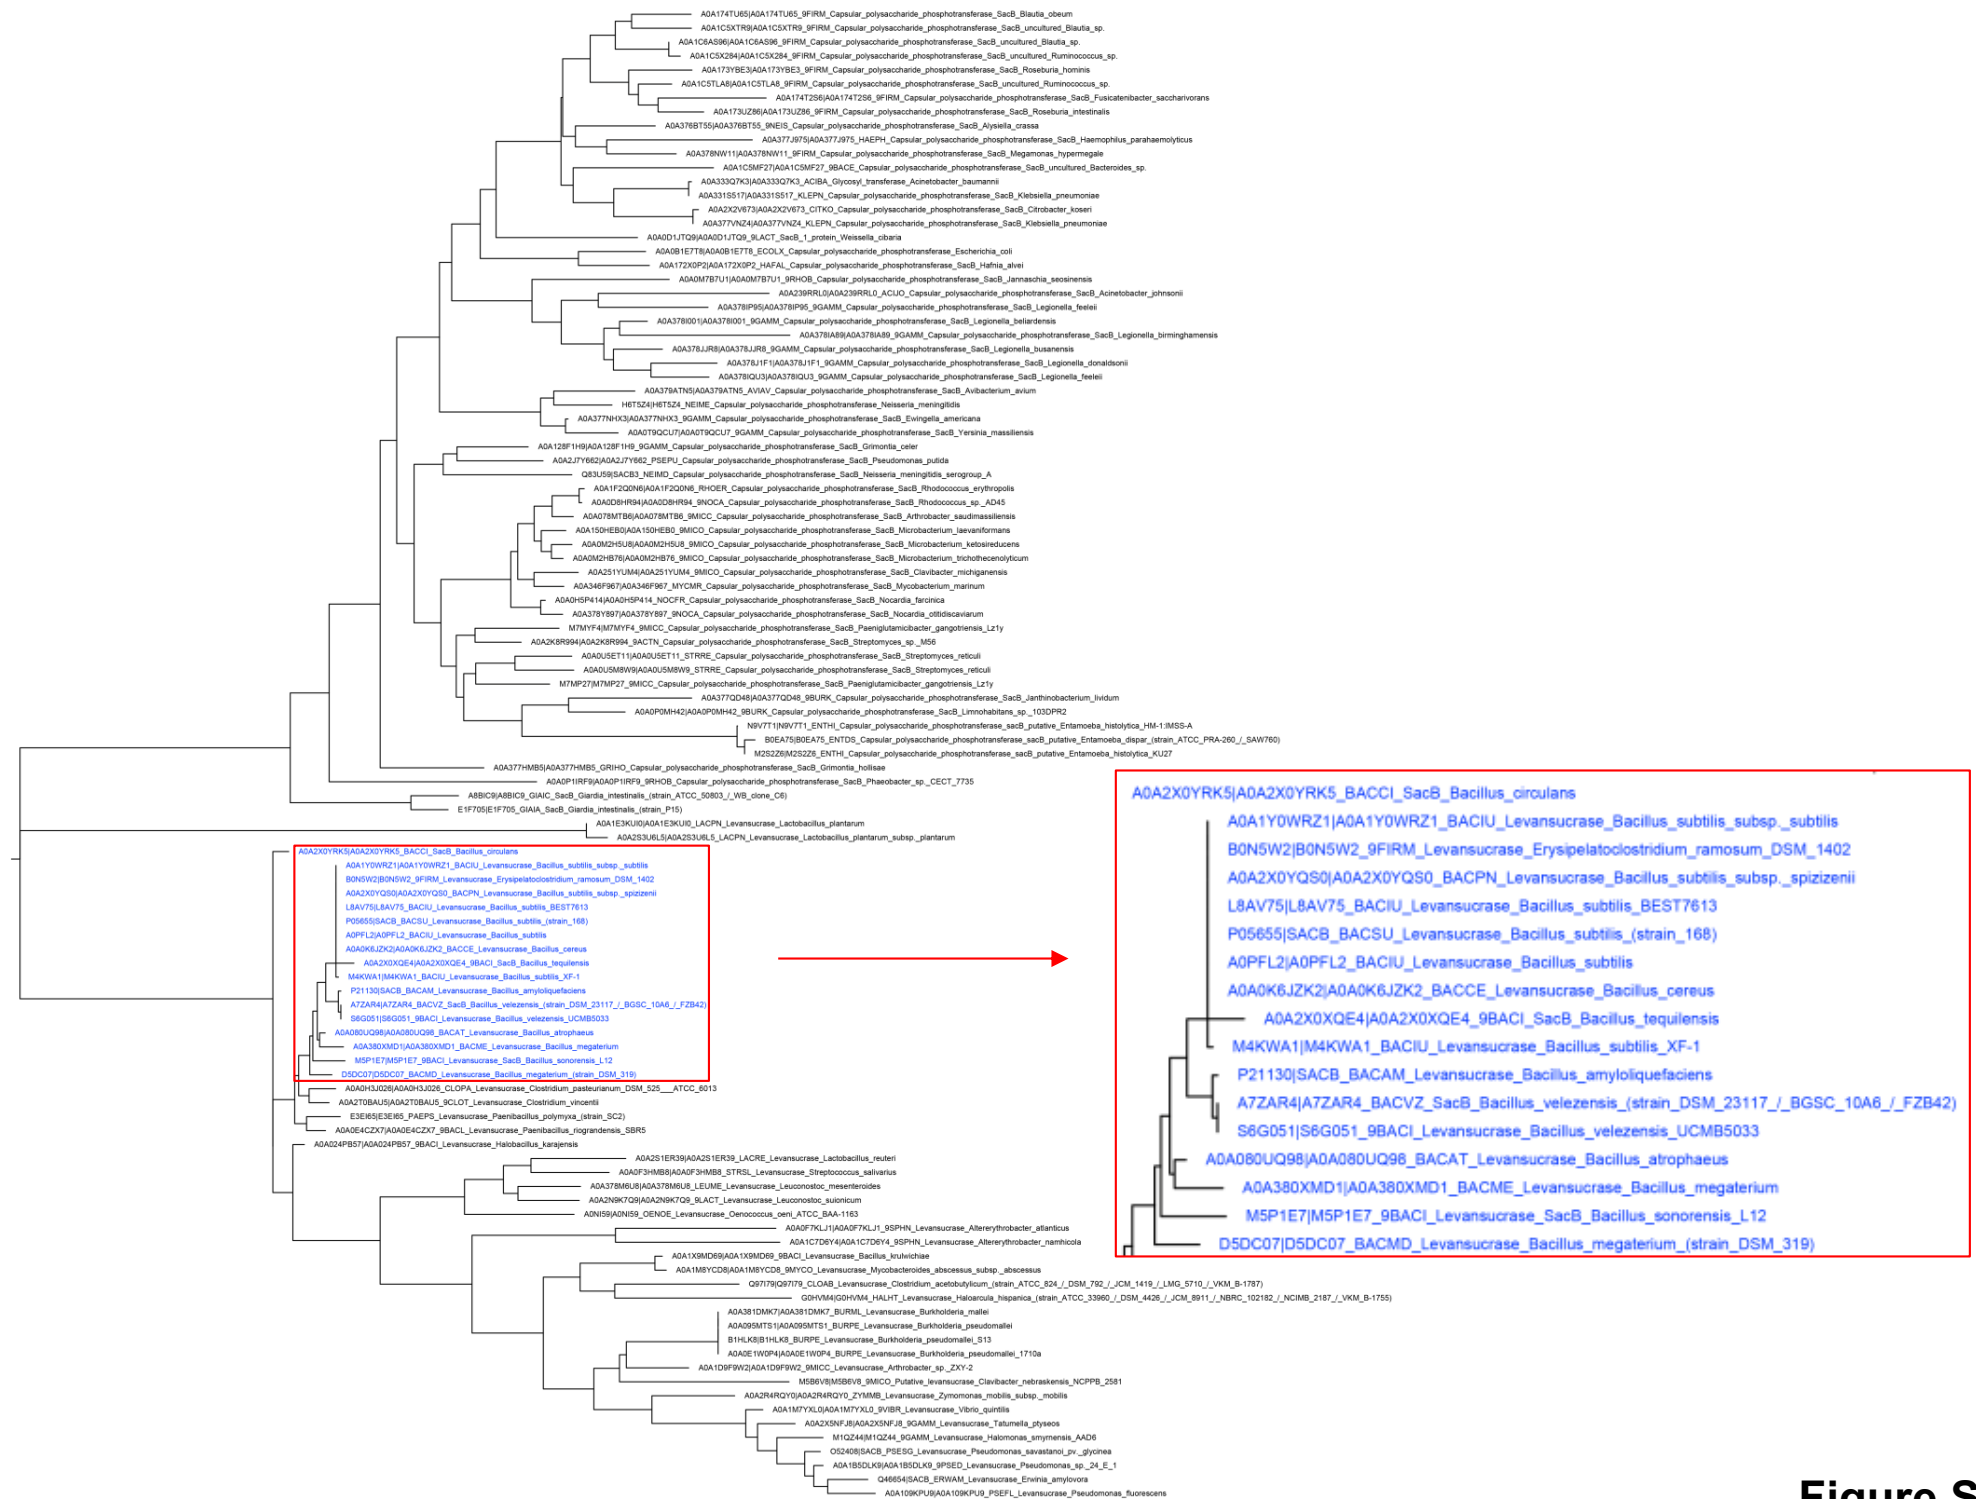

Figure S8

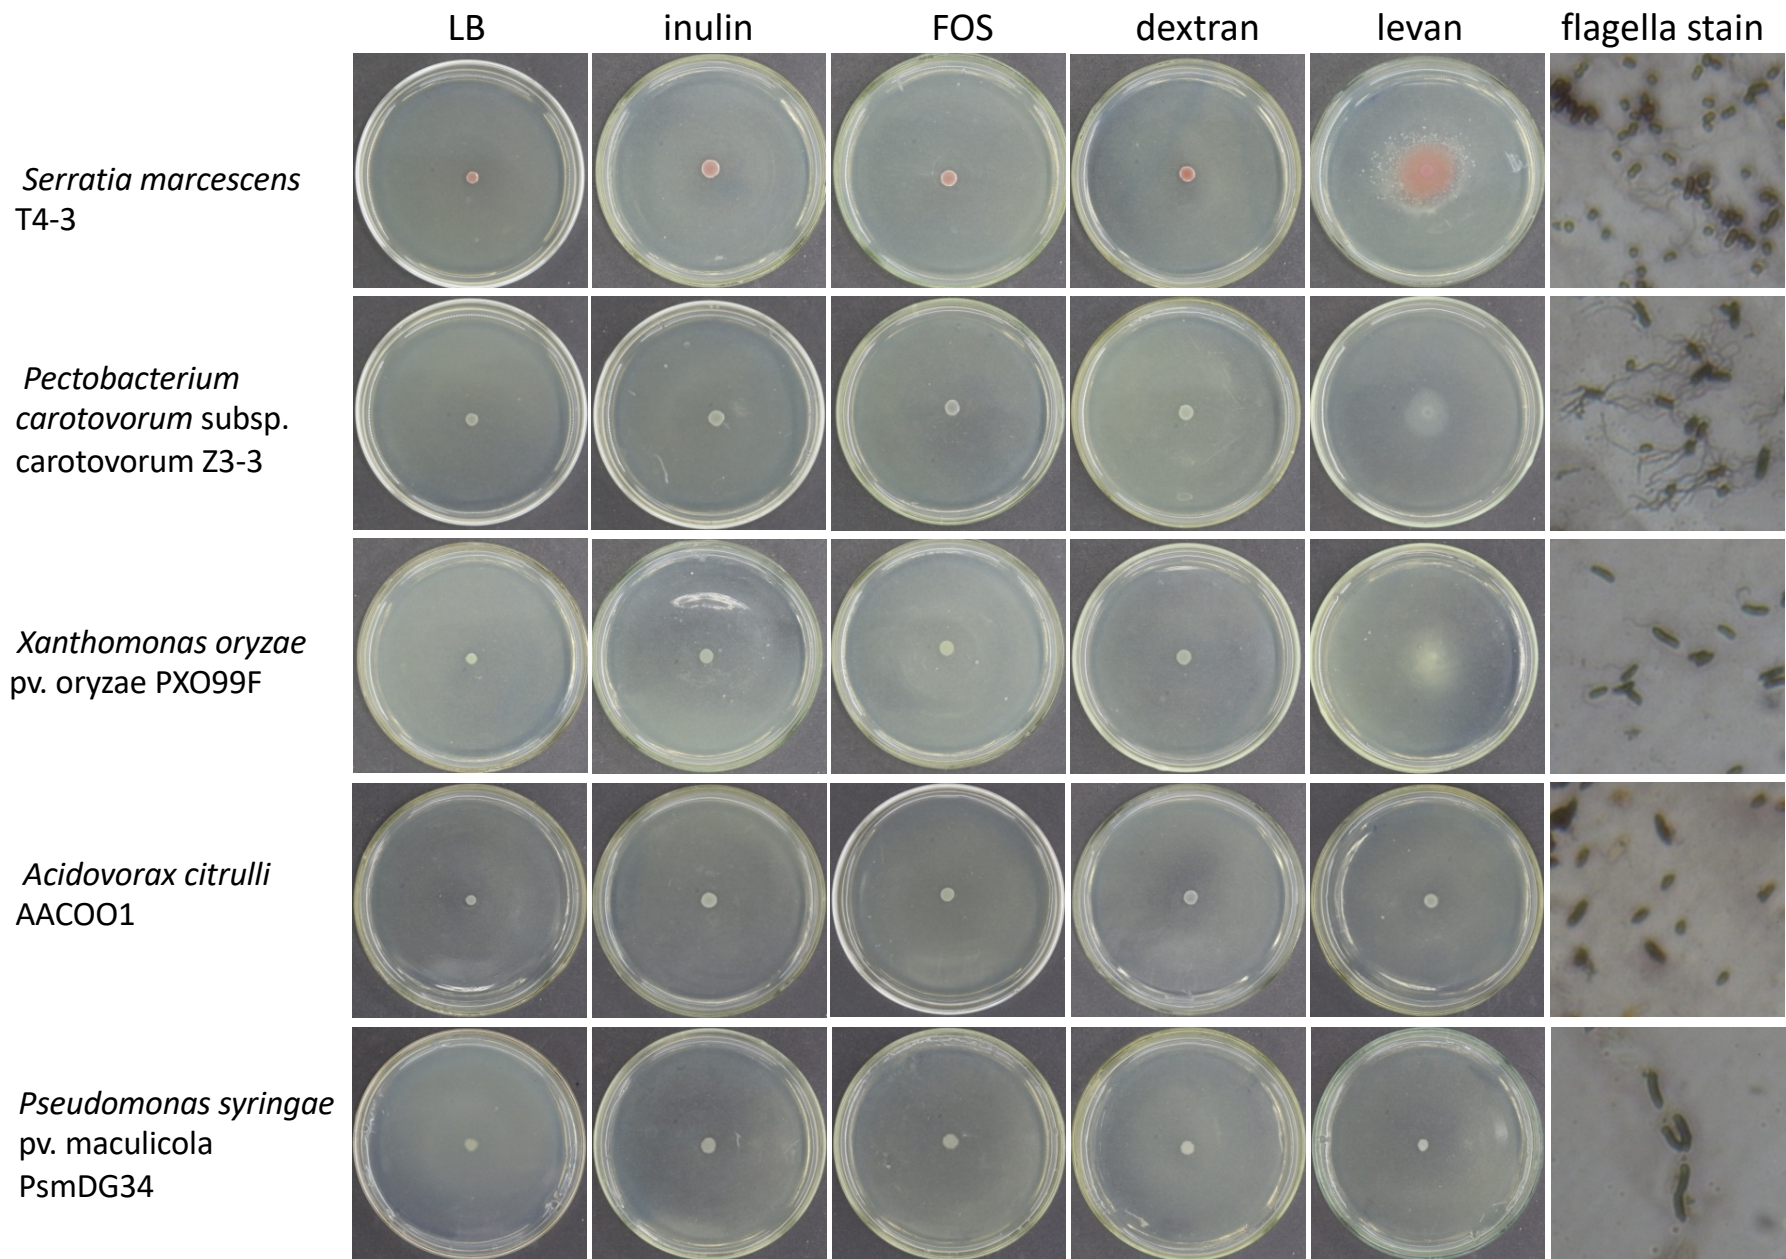

**Figure S9**

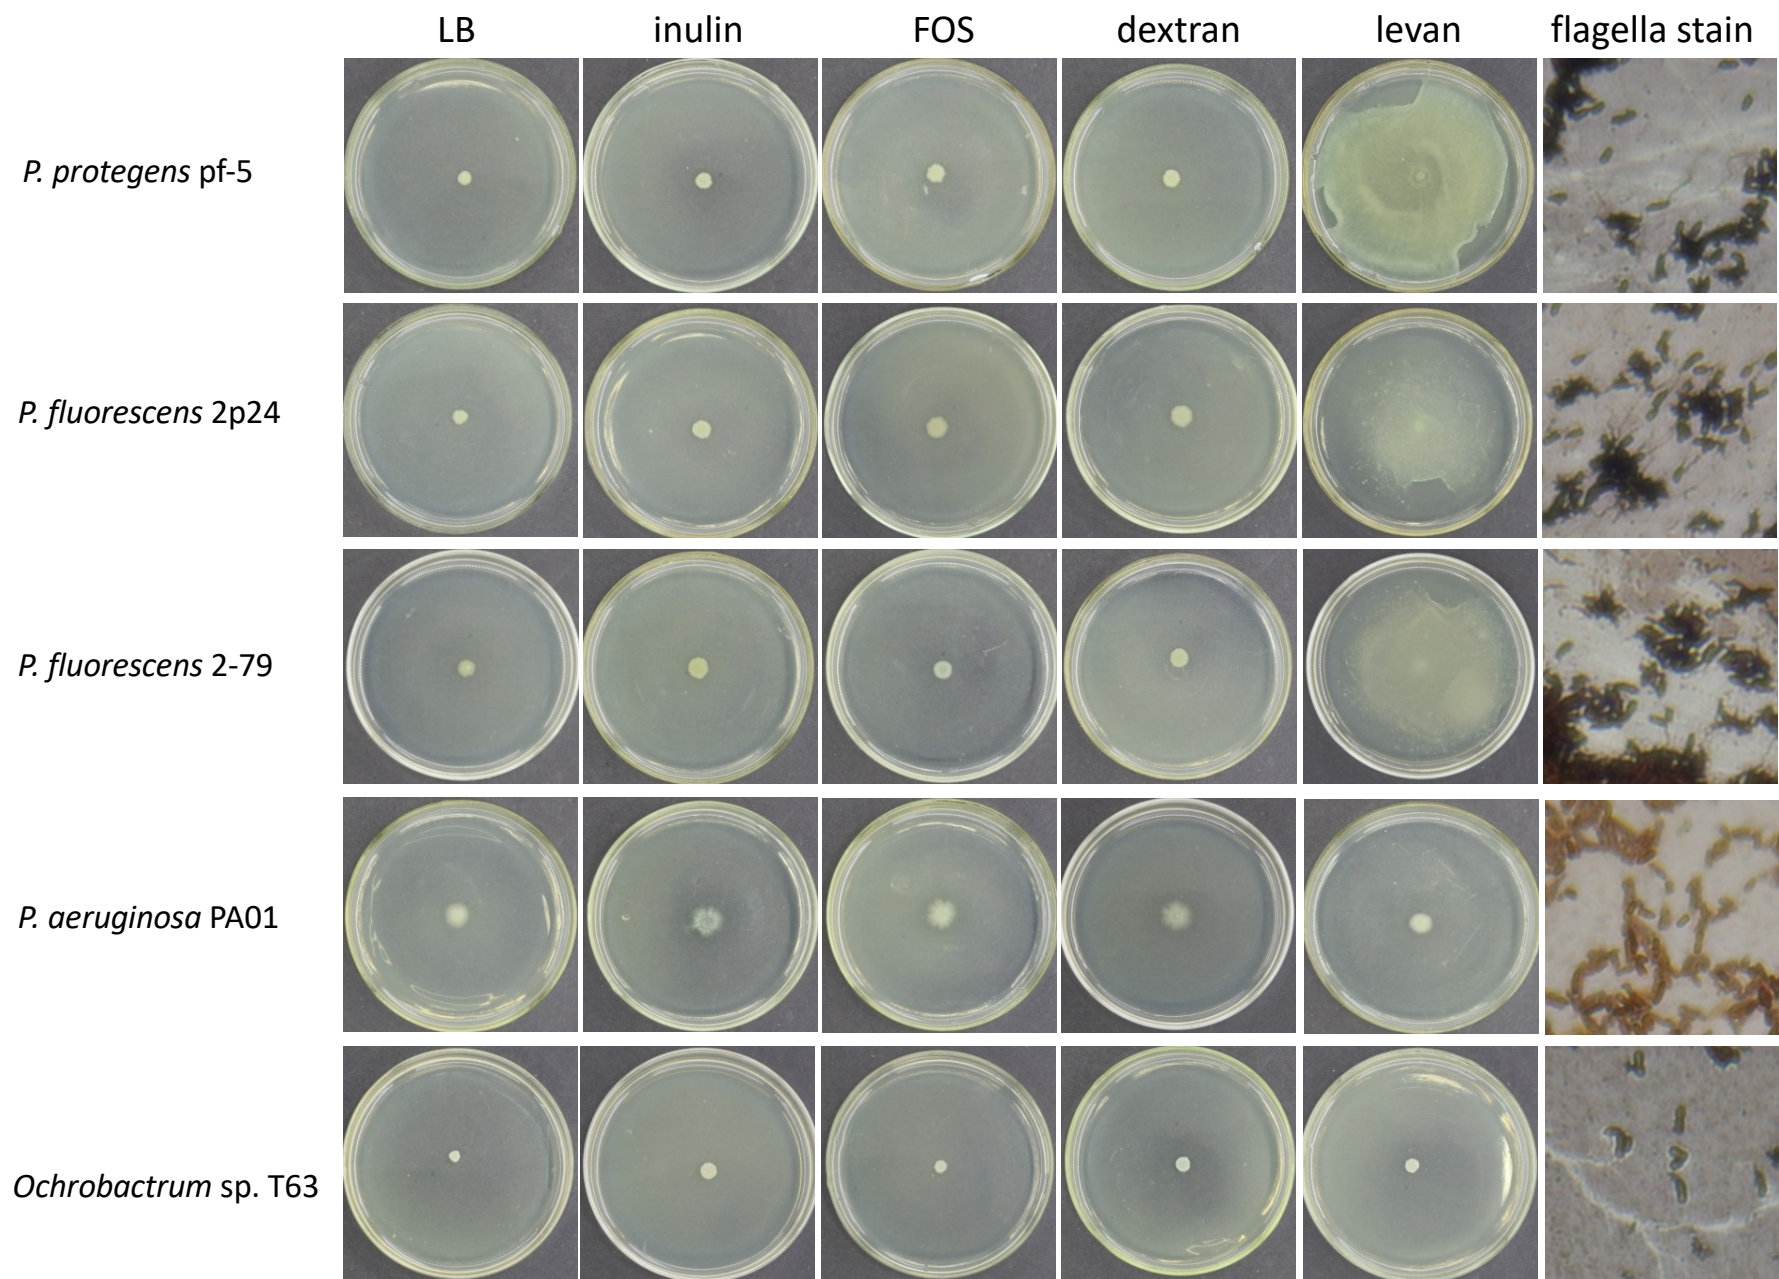

**Figure S9**
